# Supplementary material for: Long-Term Diet Quality and Risk of Diabetes in a National Survey of Chinese Adults
Source: MDPI journal article supplement (doi:10.3390/nu14224841), 2022-11-16
Supplement: s1 [file s1]

## Supplementary Materials

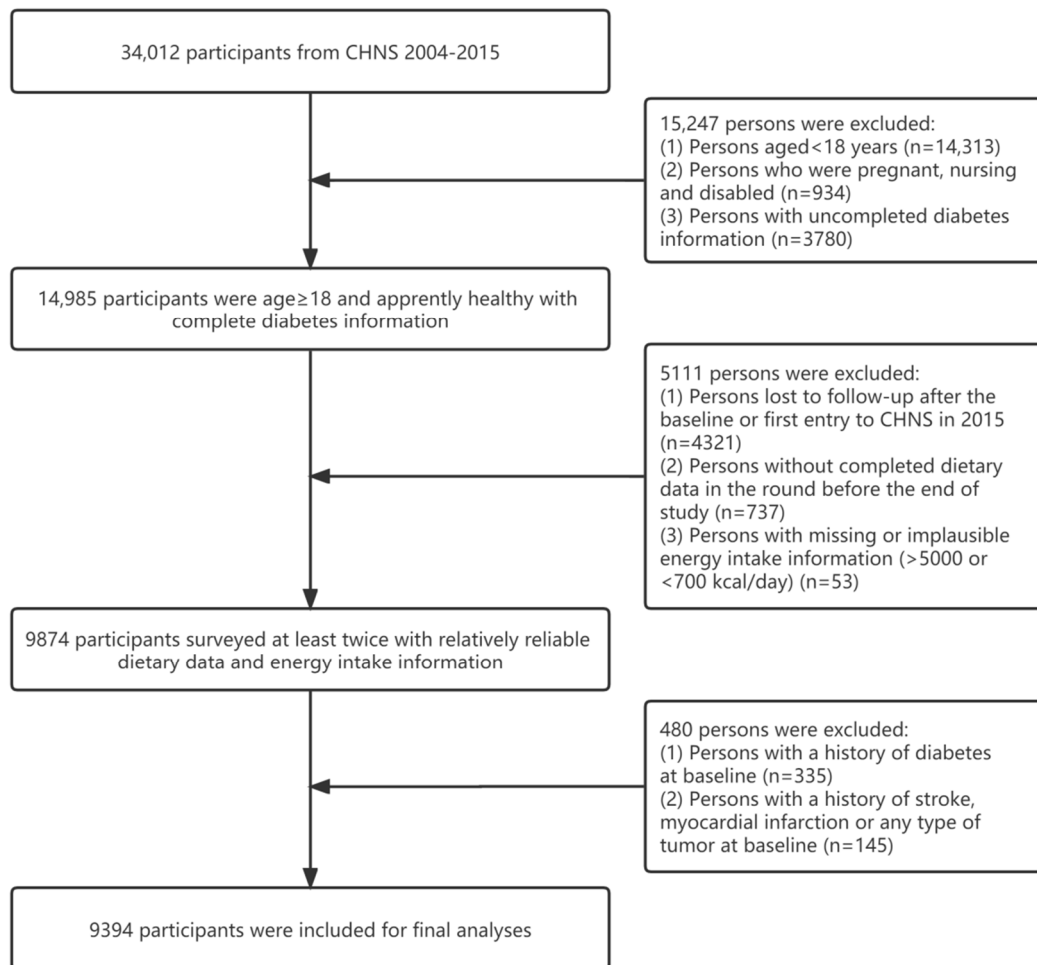

**Figure S1.** Flow chart of the study.

**Table S1.** First sensitivity analysis of the relative risk of developed diabetes based on the levels of LBS, HBS and DQD (N=12,107).

| Levels of DBI | Score range | N    | Cases/person-years | Model 3           |
|---------------|-------------|------|--------------------|-------------------|
|               |             |      |                    | HR(95% CI)        |
| LBS           |             |      |                    |                   |
| L1            | 0-12        | 445  | 14/1840            | Ref               |
| L2            | 13-24       | 4631 | 271/27390          | 2.12 [1.23, 3.64] |
| L3            | 25-36       | 6504 | 440/43524          | 2.69 [1.55, 4.66] |
| L4            | >36         | 527  | 44/2311            | 4.65 [2.50, 8.67] |
| HBS           |             |      |                    |                   |
| L1            | 0-9         | 733  | 37/2904            | Ref               |
| L2            | 10-18       | 7886 | 486/53633          | 1.04 [0.74, 1.46] |
| L3            | 19-27       | 3358 | 240/18057          | 1.22 [0.86, 1.73] |
| L4            | >27         | 130  | 6/470              | 1.02 [0.43, 2.43] |
| DQD           |             |      |                    |                   |
| L1&2          | 0-34        | 2020 | 103/10316          | Ref               |
| L3            | 35-50       | 8337 | 518/55263          | 1.25 [1.00, 1.56] |
| L4            | >50         | 1750 | 148/9485           | 1.99 [1.51, 2.61] |

Note: Scores of three DBI indicators was calculated using the dietary data from baseline and divided into 4 levels according to the same methods of Table 3 in the article. HRs and 95% CIs were adjusted for the variables listed for model 3 of Table 3.

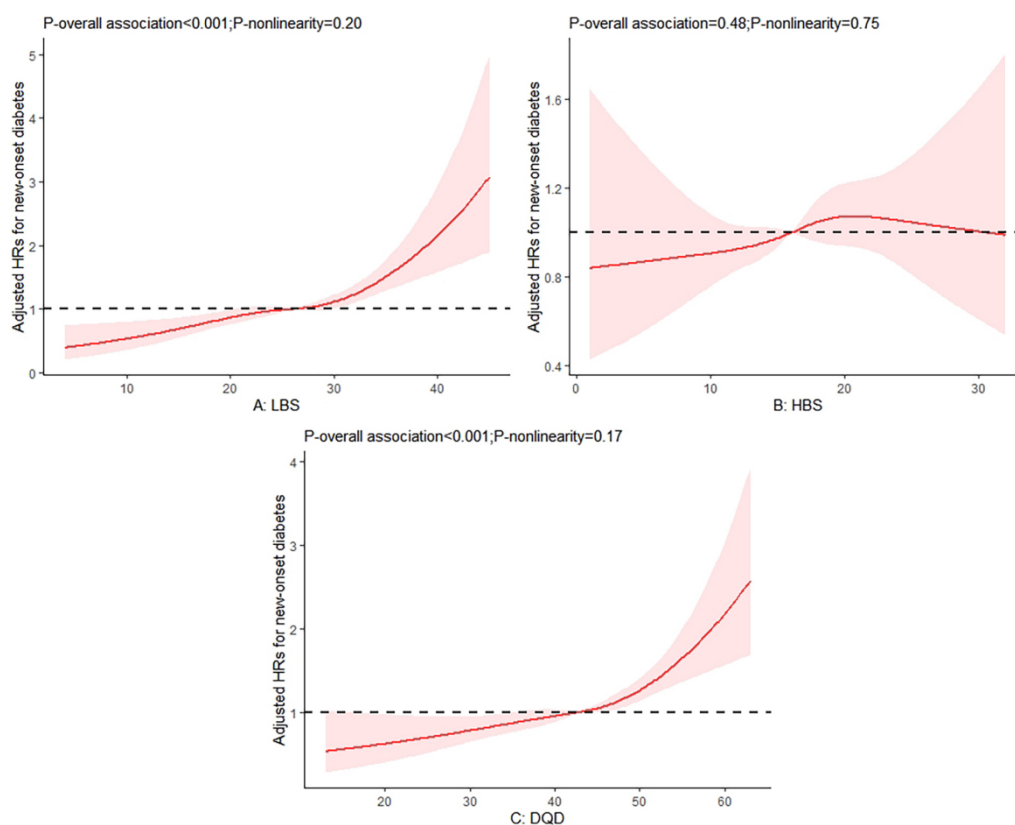

**Figure S2.** First sensitivity analysis of the relation of (A) LBS, (B) HBS, and (C) DQD with the risks of diabetes.

Note: Adjusted for age, sex, education level, urban or rural residence, physical activity, smoking, alcoholic drinking, body mass index (BMI), as well as hypertension.

**Table S2.** Second sensitivity analysis of the relative risk of developed diabetes based on the levels of LBS, HBS and DQD (N=6344).

| Levels of DBI | Score range | N    | Cases/person-years | Model 3            |
|---------------|-------------|------|--------------------|--------------------|
|               |             |      |                    | HR(95% CI)         |
| LBS           |             |      |                    |                    |
| L1            | 0-12        | 337  | 12/1424            | Ref                |
| L2            | 13-24       | 2952 | 160/17614          | 1.94 [1.07, 3.50]  |
| L3            | 25-36       | 2924 | 204/20631          | 2.76 [1.50, 5.07]  |
| L4            | >36         | 131  | 11/664             | 4.31 [1.85, 10.04] |
| HBS           |             |      |                    |                    |
| L1            | 0-9         | 480  | 26/1976            | Ref                |
| L2            | 10-18       | 4044 | 226/28389          | 0.96 [0.64, 1.45]  |
| L3            | 19-27       | 1740 | 133/9669           | 1.28 [0.83, 1.95]  |
| L4            | >27         | 80   | 2/297              | 0.55 [0.13, 2.31]  |
| DQD           |             |      |                    |                    |
| L1&2          | 0-34        | 1439 | 68/7476            | Ref                |
| L3            | 35-50       | 4269 | 257/29144          | 1.38 [1.04, 1.83]  |
| L4            | >50         | 636  | 62/3712            | 2.53 [1.74, 3.67]  |

Note: Scores of three DBI indicators was calculated using the dietary data from baseline and divided into 4 levels according to the same methods of Table 3 in the article. HRs and 95% CIs were adjusted for the variables listed for model 3 of Table 3.

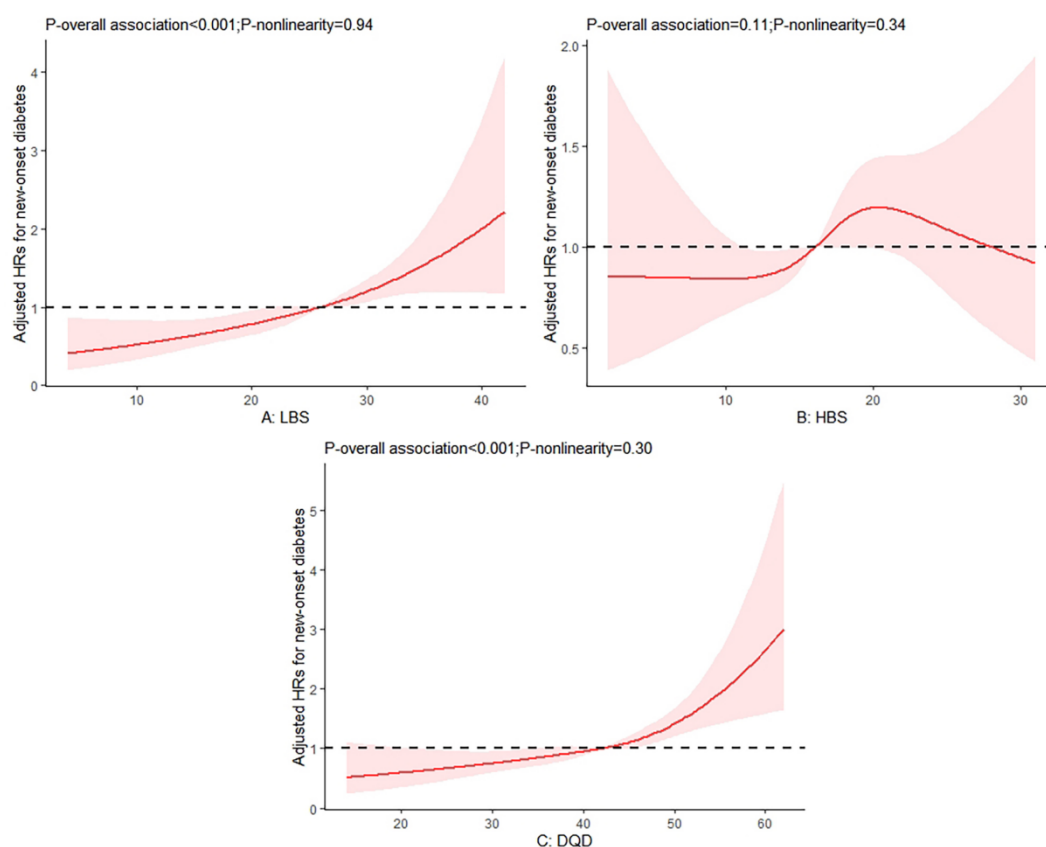

**Figure S3.** Second sensitivity analysis of the relation of (A) LBS, (B) HBS, and (C) DQD with the risks of diabetes.

Note: Adjusted for age, sex, education level, urban or rural residence, physical activity, smoking, alcoholic drinking, body mass index (BMI), as well as hypertension.
